# Supplementary material for: Rapid microfluidic platform for screening and enrichment of cells secreting virus neutralizing antibodies
Source: Royal Society of Chemistry journal article supplement (doi:10.1039/d2lc00018k), 2022-01-01
Supplement: d2lc00018k1.pdf [file d2lc00018k1.pdf]

## Supplementary Information

### Rapid microfluidic platform for screening and enrichment of cells secreting virus neutralizing antibodies

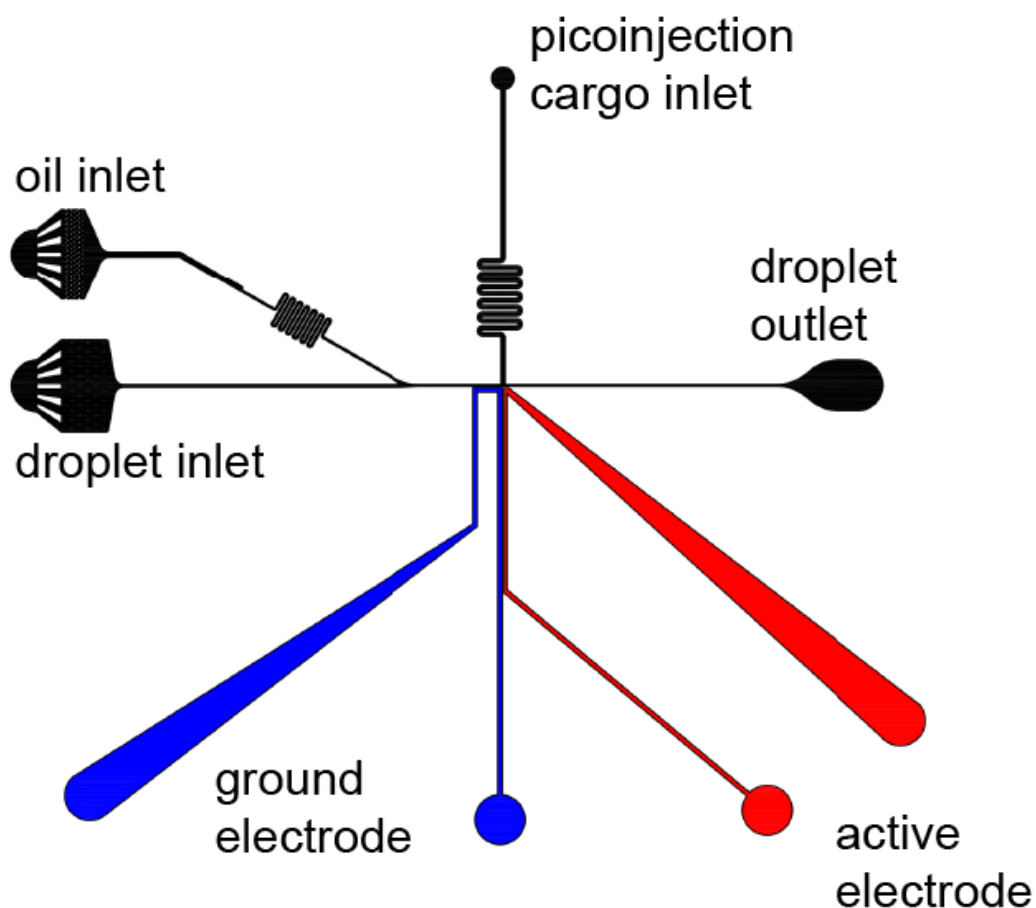

**Supplementary Figure 1:** Schematic of picoinjector used in study. Additional fluidic resistor was added into the picoinjection cargo channel to stabilize the injection process

| <b>Droplet media composition</b>         | <b>Average droplet Ab concentration at 0 hour (µg/mL)</b> | <b>Average droplet Ab concentration at 24 hour (µg/mL)</b> | <b>Average Ab concentration of cell-containing droplets at 24 hour (µg/mL)</b> |
|------------------------------------------|-----------------------------------------------------------|------------------------------------------------------------|--------------------------------------------------------------------------------|
| DMEM/F12 + 20% FBS                       | 0.040                                                     | 1.090                                                      | 10.9                                                                           |
| DMEM/F12 GlutaMAX supplemented + 20% FBS | 0.049                                                     | 0.923                                                      | 9.23                                                                           |
| DMEM/F12 + 20% FBS + 25mM HEPES          | 0.028                                                     | 0.129                                                      | 1.29                                                                           |
| DMEM/F12 + 20% FBS + 0.1% Pluronic F68   | 0.007                                                     | 0.555                                                      | 5.55                                                                           |

**Supplementary Table 1:** The average concentration of nAbs recovered from the supernatant of droplets containing ASCs. 70 µm diameter droplets containing 10% singly-encapsulated ASCs were incubated for 24 hours to allow accumulation of nAbs prior to demulsification and quantification via ELISA. DMEM/F12 + 20% FBS (highlighted blue) was used for all in-droplet processes stated in the main text as it exhibited the best performance.

|                                        | Droplet diameter<br>( $\mu\text{m}$ ) | Estimated droplet<br>volume (pL) | Estimated volume<br>change (%) |
|----------------------------------------|---------------------------------------|----------------------------------|--------------------------------|
| Original droplet<br>size               | $70.62 \pm 0.36$                      | 184.4                            | –                              |
| After 1 <sup>st</sup><br>picoinjection | $81.00 \pm 0.92$                      | 278.3                            | +50.9                          |
| After 2 <sup>nd</sup><br>picoinjection | $89.70 \pm 1.12$                      | 377.9                            | +35.8                          |

**Supplementary Table 2:** Droplet diameter changes after two rounds of picoinjection (virus followed by host cells).

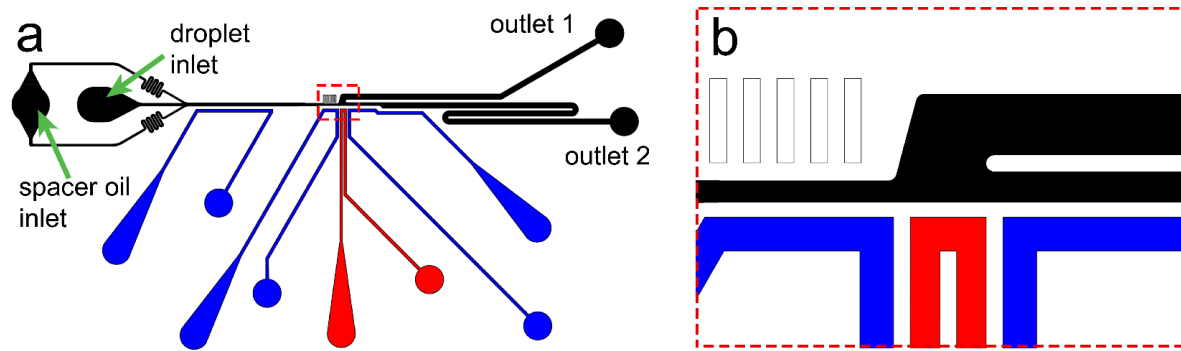

**Supplementary Figure 2:** (a) Schematic of sorter chip used in study. Blue electrodes represent ground electrodes while red electrode represents active electrode. (b) Magnified view of boxed region where sorting occurs.

|                      | Average droplet signal | Median | 95 percentile | 99 percentile | 99.2 percentile | 99.5 percentile |
|----------------------|------------------------|--------|---------------|---------------|-----------------|-----------------|
| Signal intensity (v) | 0.240                  | 0.229  | 0.386         | 0.470         | 0.480           | 0.502           |

**Supplementary Table 3:** PMT signal distribution of droplets containing 293T cells without virus.
